# Supplementary material for: Interactions between COVID-19 lockdown and ambient carbon monoxide on child and adolescent psychiatric outpatient visits: A time-series study in Shenzhen, China
Source: Research Square preprint supplement (doi:10.21203/rs.3.rs-8256831/v1), 2026-01-21
Supplement: Supplementary file 1 [file 85fbb69c248216f9898e4da4.docx]

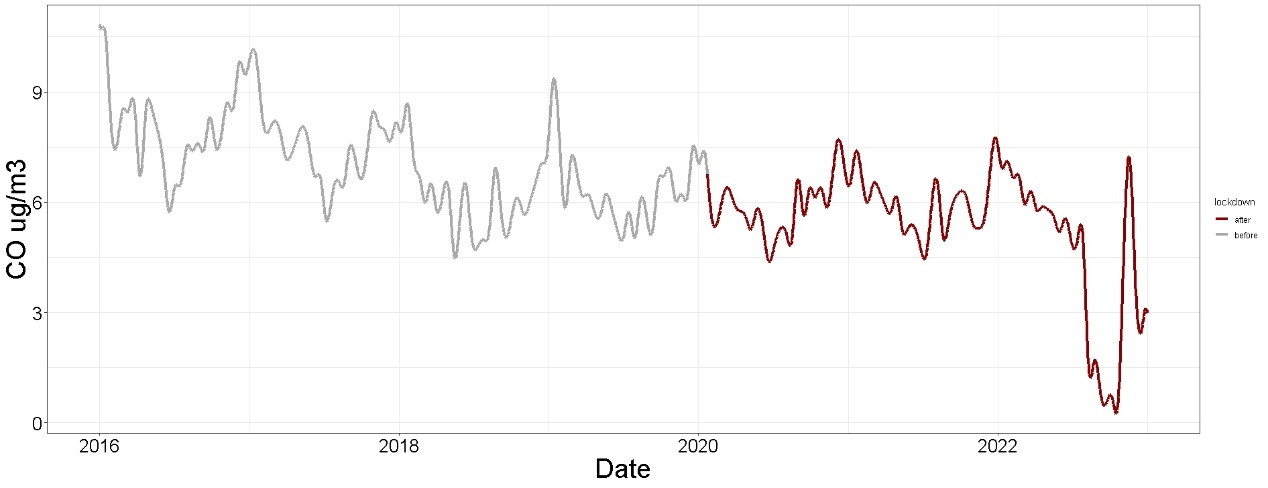


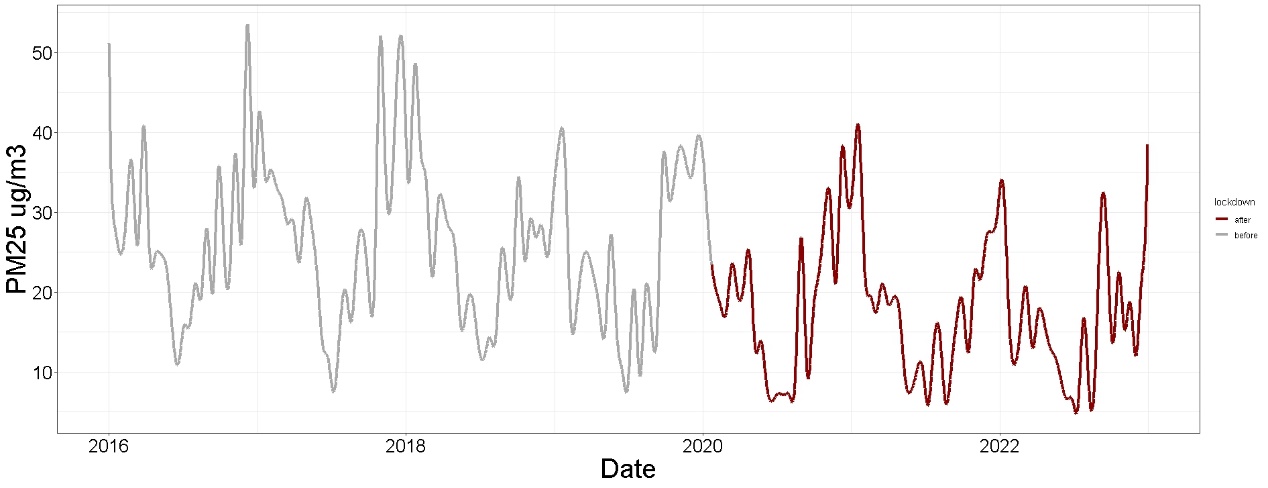


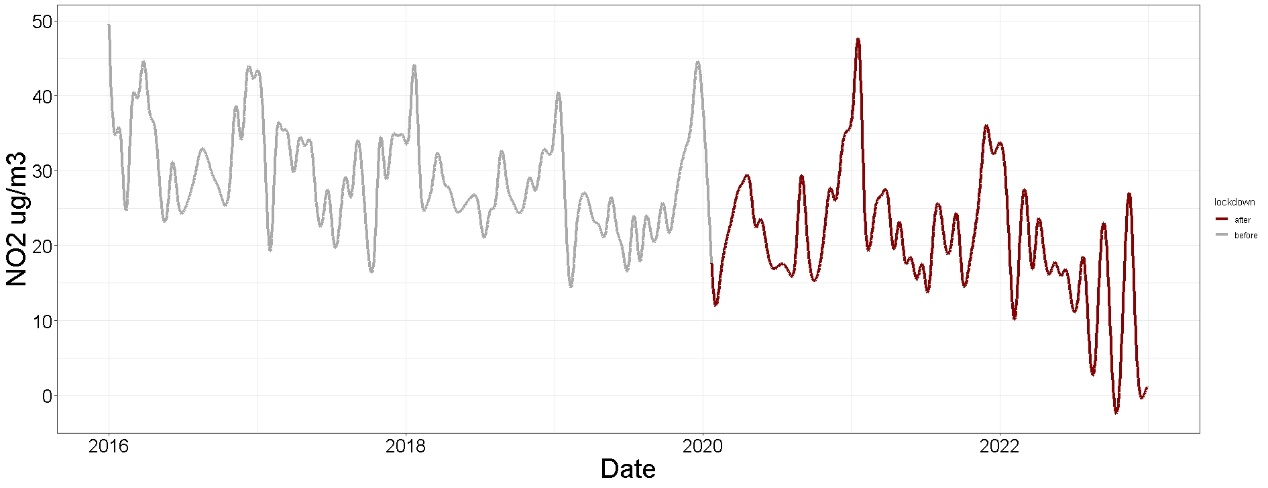


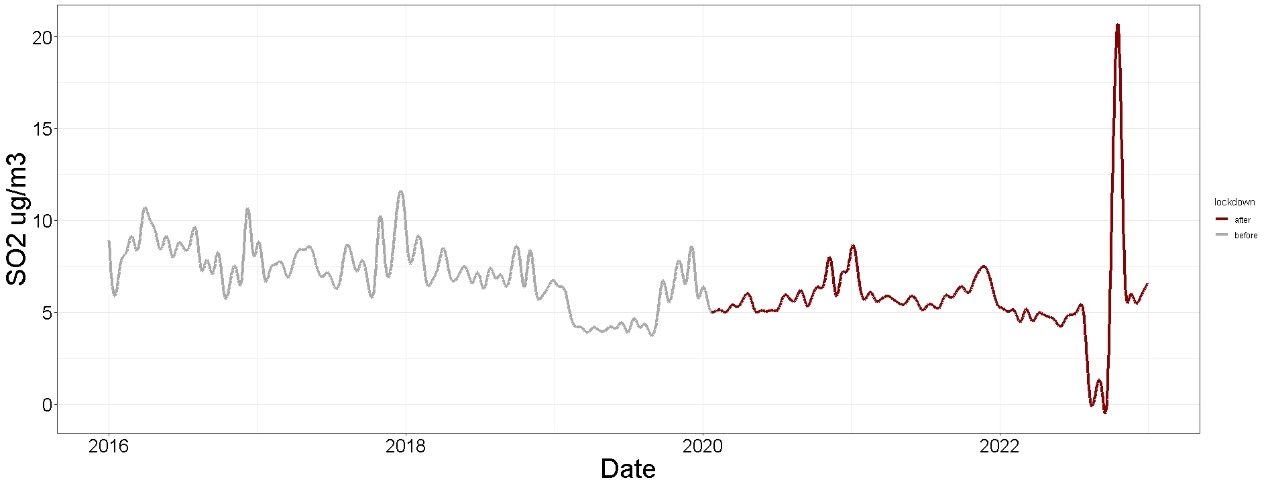


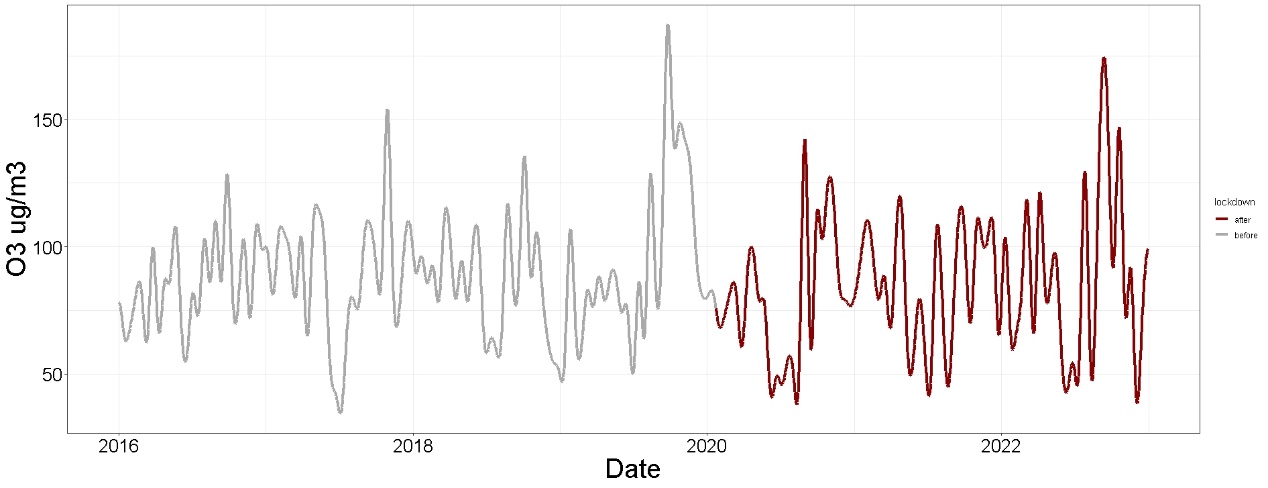


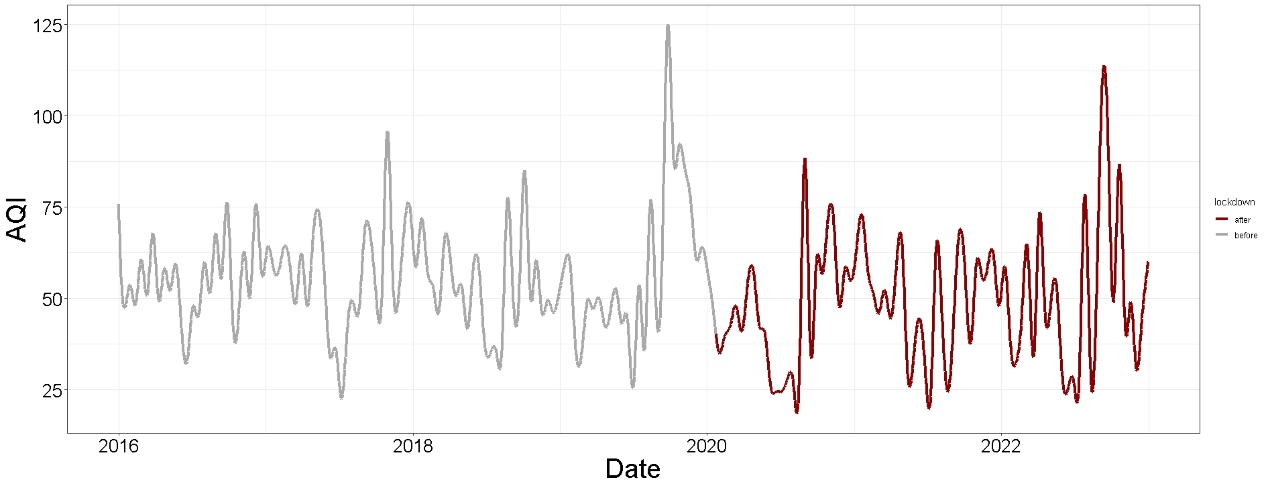


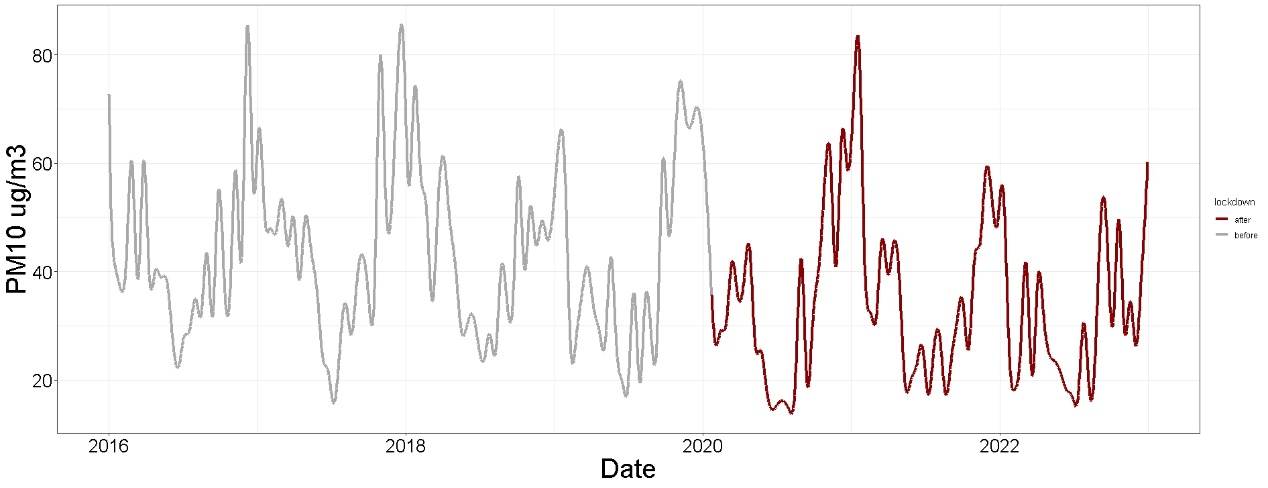


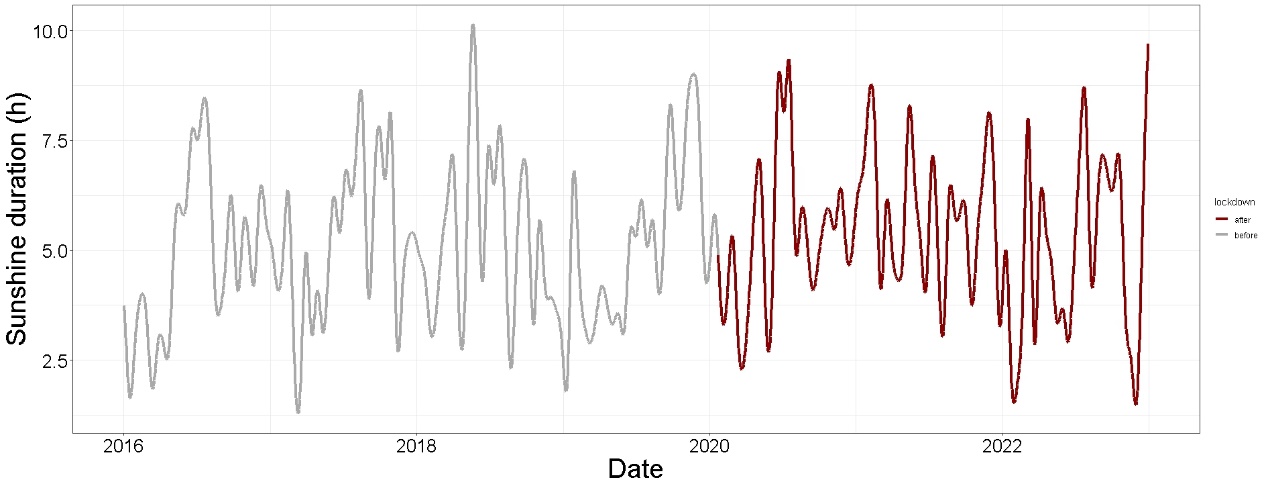


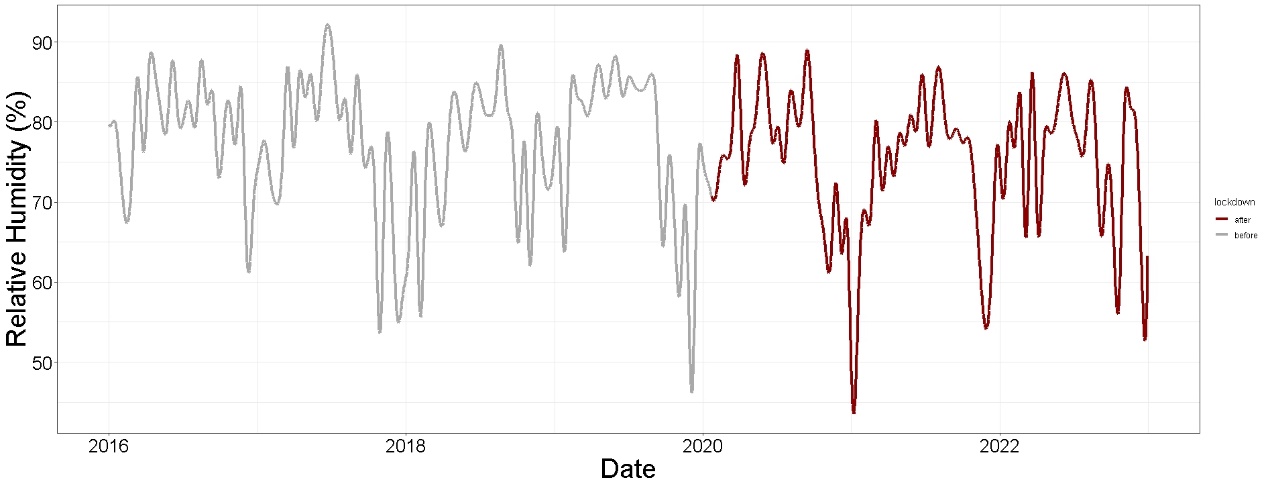


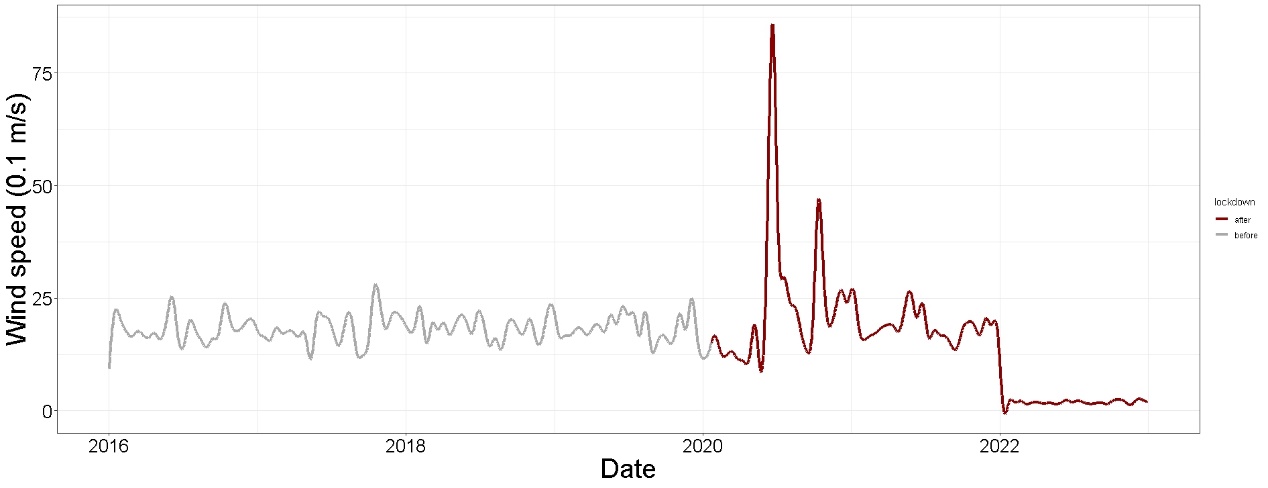


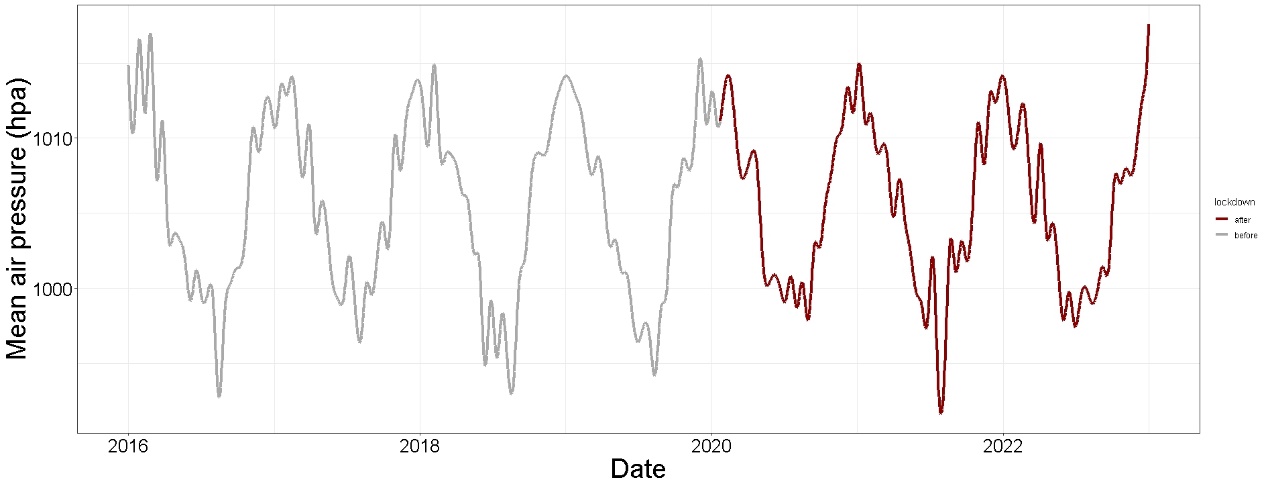


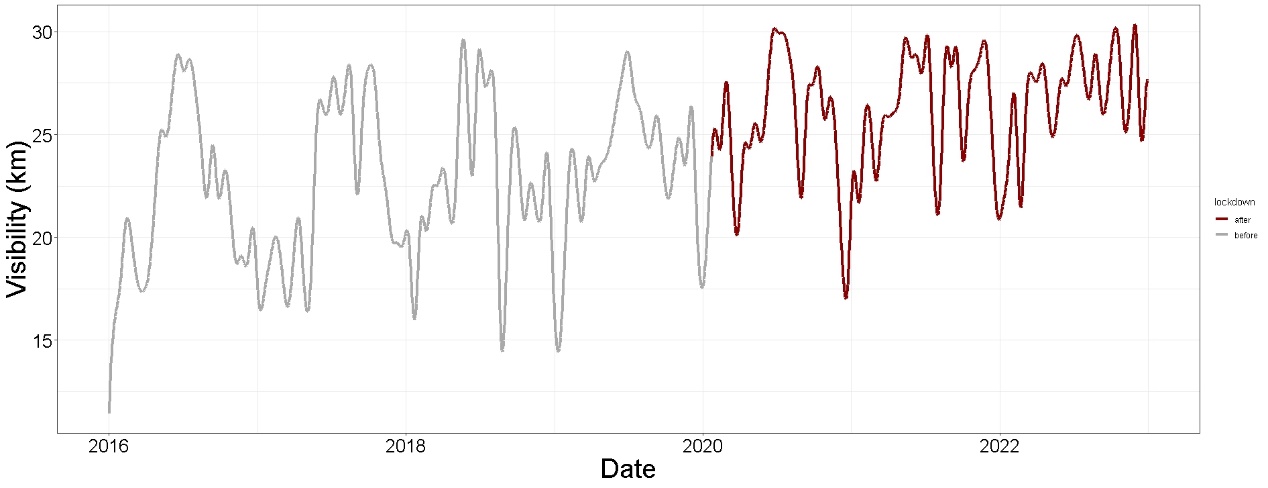


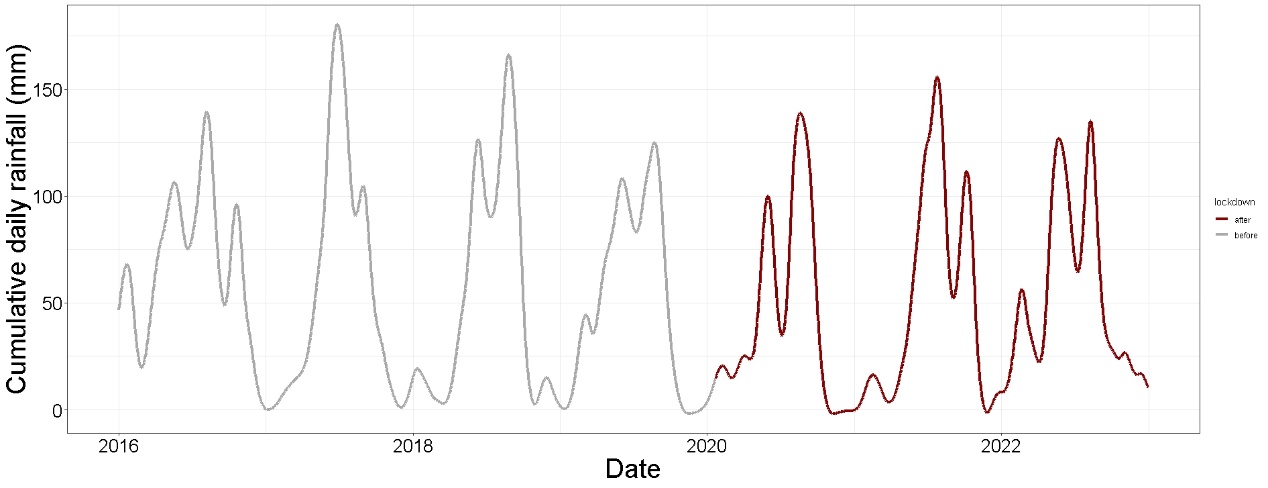


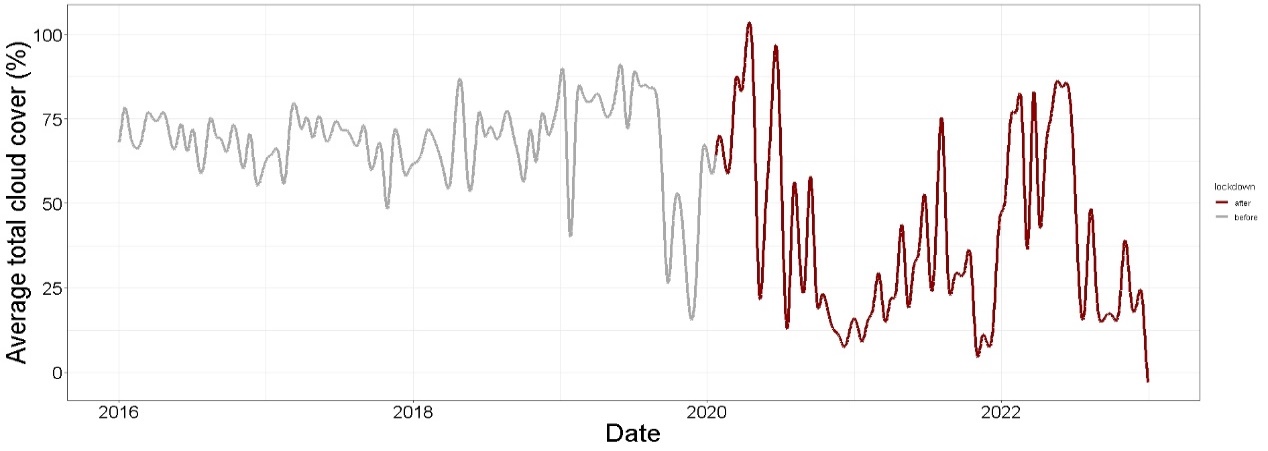


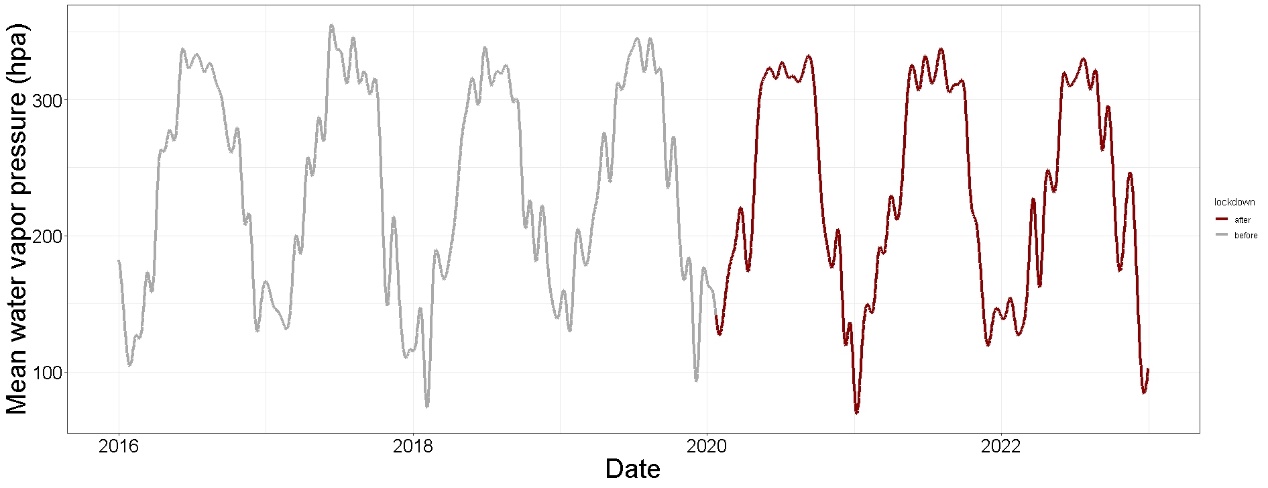


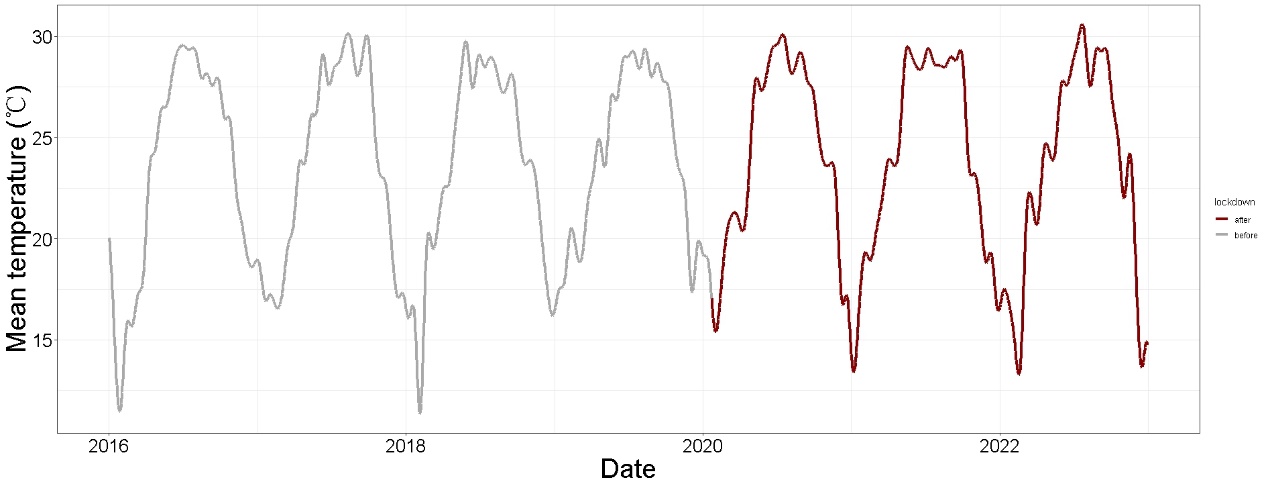


**Fig.S1** Time series plots of all meteorological factors in Shenzhen from 2016 to 2022.


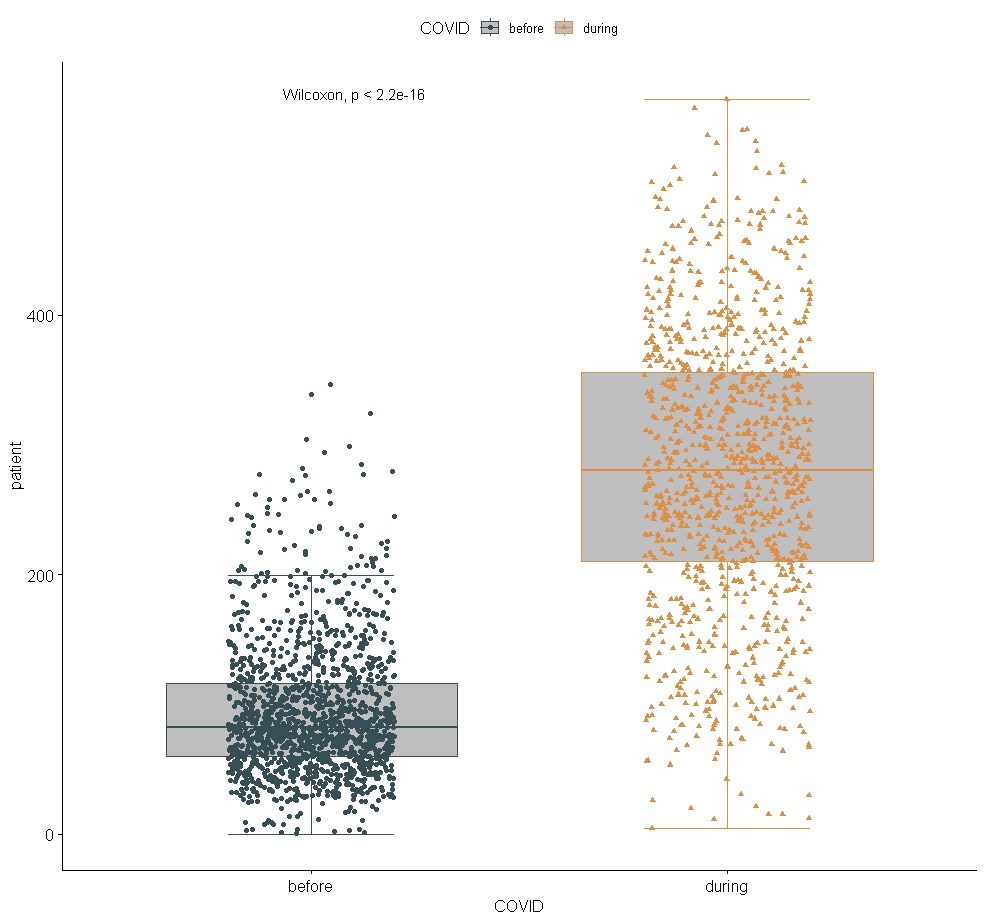


**Fig S2.** The Wilcoxon test result of CAPC visits before and during COVID-19 lockdown in Shenzhen.


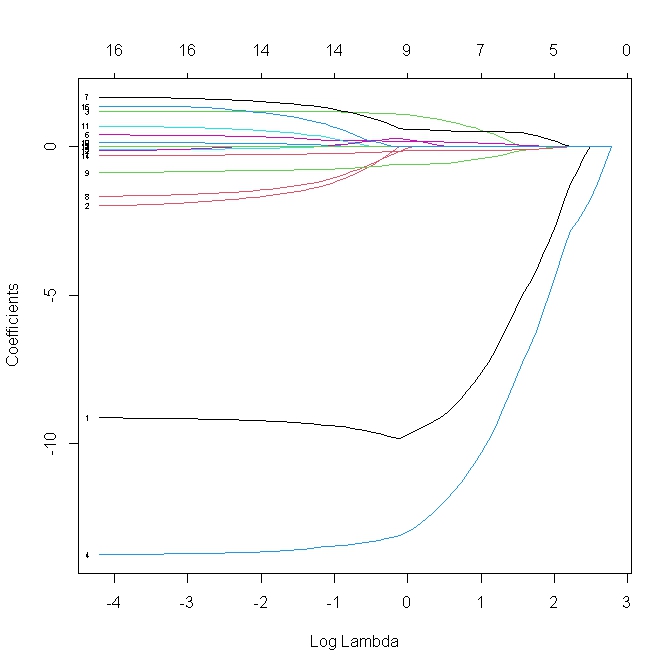


(a)


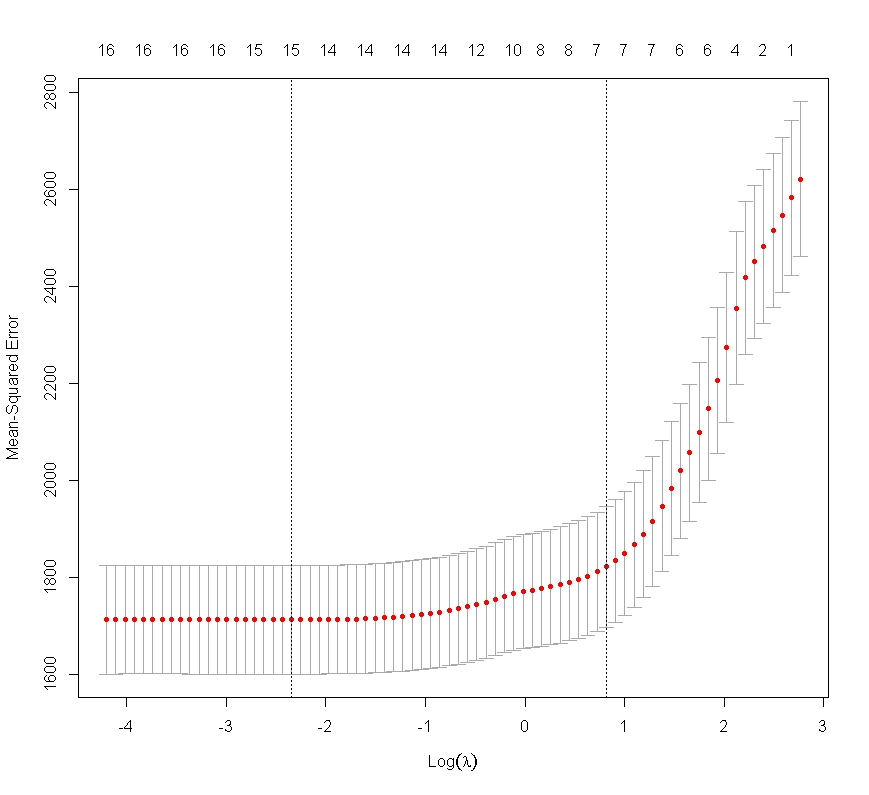


(b)


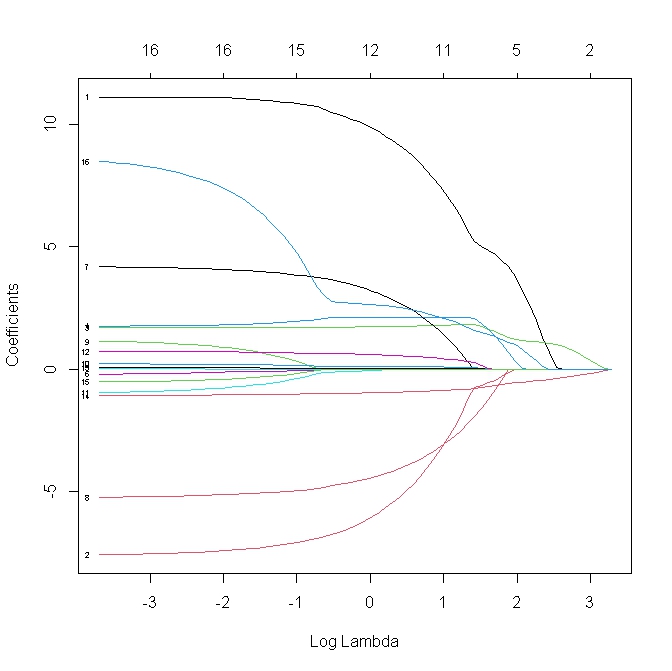


(c)


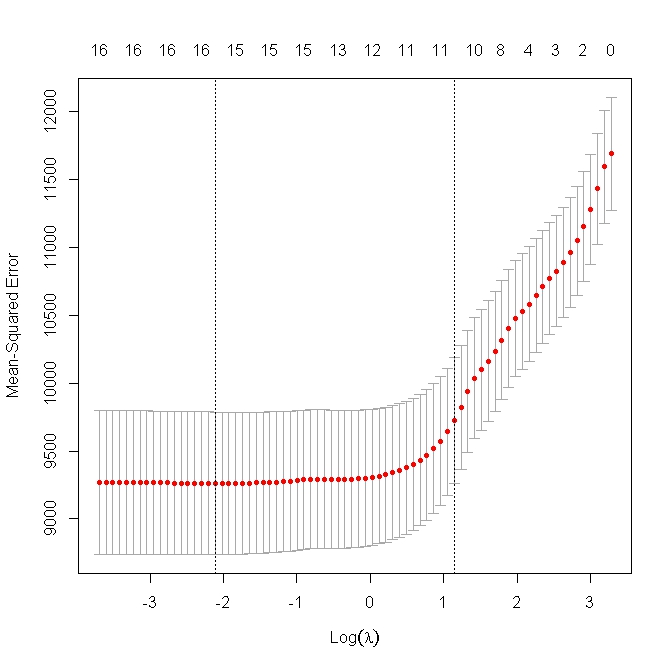


**(d)**

**Fig.S 3** The fitting plot of λ. (a) The fitting process of λ in 2016.1.1-2020.1.22 (b) the plot of cross-validation curve in 2016.1.1-2020.1.22 (c) The fitting process of λ in 2020.1.23-2022.12.31 (d) the plot of cross-validation curve in 2020.1.23-2022.12.31.


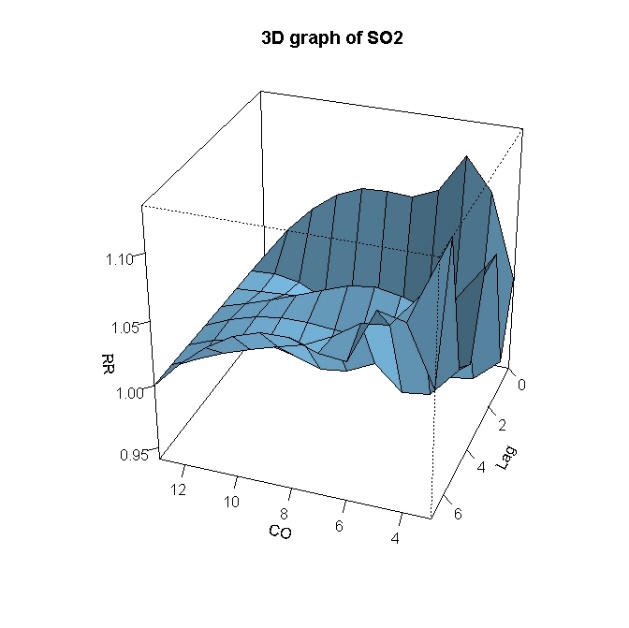

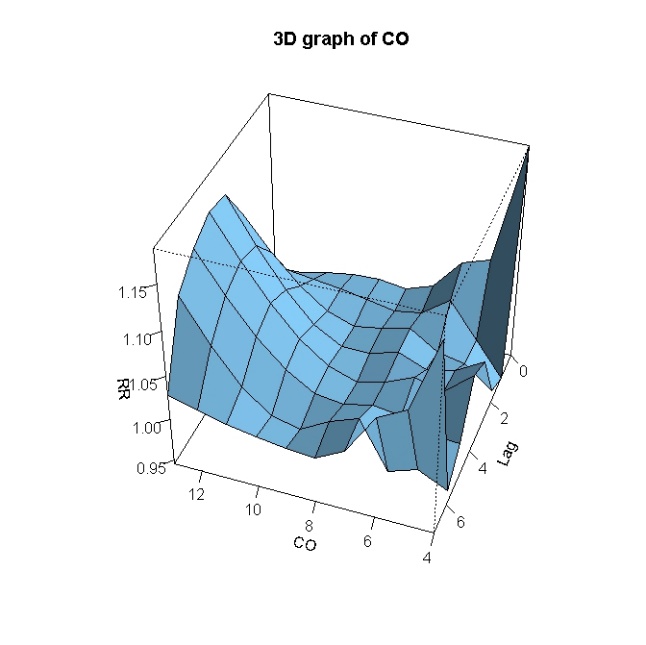


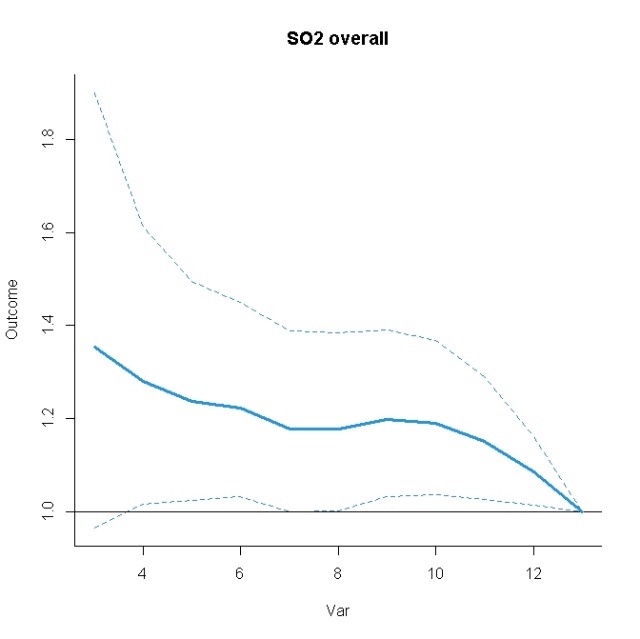

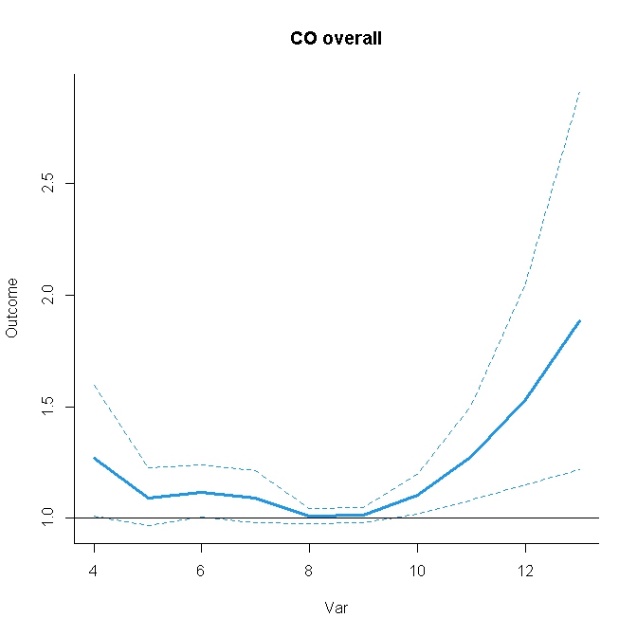


**Fig. S4** The 3-D graphs and and two-dimensional graphs of SO2 and CO overall effect on CAPC visits in Shenzhen from 2016.1.1 to 2020.1.22.


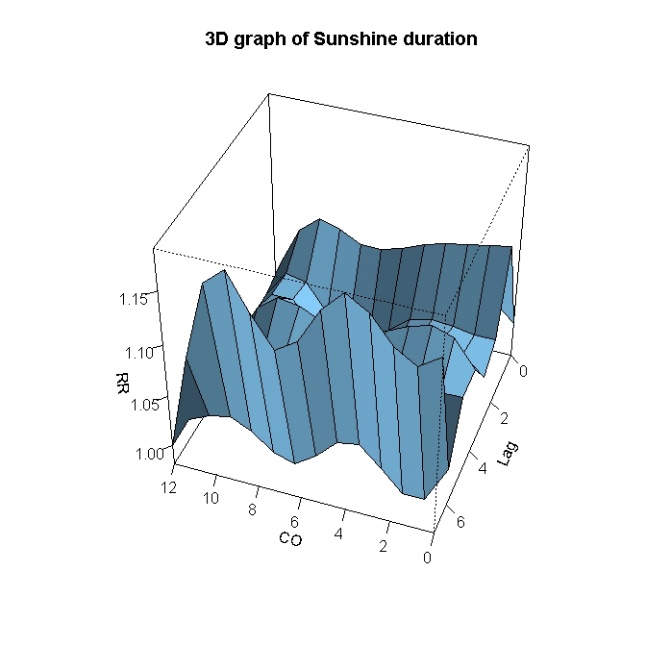

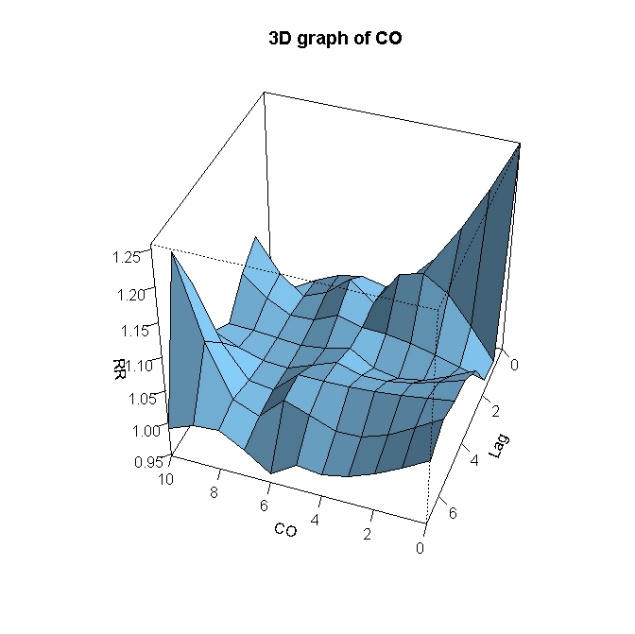


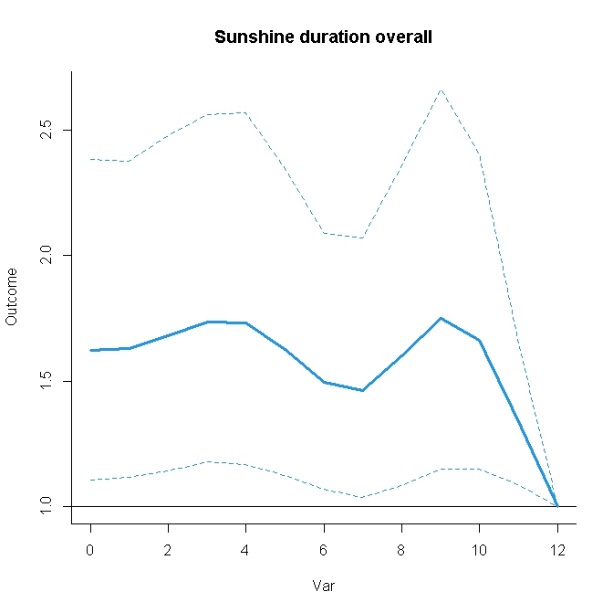

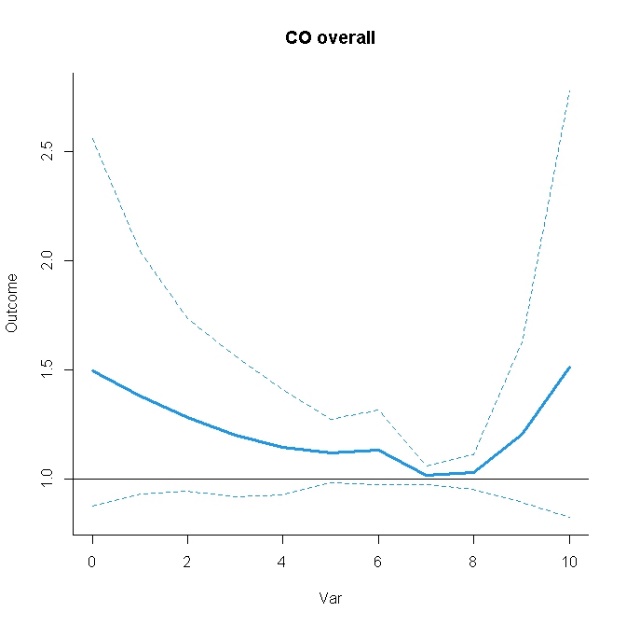


**Fig S5** The 3-D graphs and and two-dimensional graphs of sunshine duration and CO overall effect on CAPC visits in Shenzhen from 2020.1.23 to 2022.12.31.

**Table S1**. The summary and comparison of all air pollutants before and during COVID-19 lockdown.

| Factors | COVID-19 | P0 | P25 | P50 | P75 | P100 | N±S | Z | P |
| --- | --- | --- | --- | --- | --- | --- | --- | --- | --- |
| CO(mg/m3) | Before | 4 | 6 | 7 | 8 | 13 | 7.02±1.66 | -20.19 | <0.01 |
|  | During | 0.4 | 5 | 6 | 7 | 10 | 5.41±1.80 |  |  |
| PM2.5 (ug/m3) | Before | 5 | 16 | 25 | 35 | 103 | 26.39±13.61 | -17.30 | <0.01 |
|  | During | 2 | 9 | 16 | 24 | 62 | 17.62±10.73 |  |  |
| NO2 (ug/m3) | Before | 7 | 22 | 28 | 34 | 95 | 29.15±10.56 | -20.26 | <0.01 |
|  | During | 0 | 14 | 20 | 26 | 79 | 20.53±10.68 |  |  |
| SO2 (ug/m3) | Before | 3 | 6 | 7 | 8 | 19 | 7.09±2.20 | -18.41 | <0.01 |
|  | During | 1 | 5 | 6 | 6 | 28 | 5.73±2.57 |  |  |
| O3 (ug/m3) | Before | 10 | 58 | 83 | 114 | 245 | 89.02±39.61 | -3.15 | <0.01 |
|  | During | 15 | 51 | 78 | 110 | 250 | 84.51±39.15 |  |  |
| Air Quality Index (AQI) | Before | 19 | 38 | 50 | 67 | 180 | 55.63±25.12 | -8.43 | <0.01 |
|  | During | 17 | 29 | 44 | 61 | 185 | 48.96±25.30 |  |  |
| PM10(ug/m3) | Before | 9 | 27 | 39 | 56 | 146 | 43.51±20.85 | -12.22 | <0.01 |
|  | During | 3 | 19 | 31 | 45 | 124 | 34.02±18.26 |  |  |
| Sunshine duration (h) | Before | 0 | 1.3 | 5.1 | 8.6 | 12.2 | 5.10±3.79 | -1.95 | 0.05 |
|  | During | 0 | 1.5 | 5.7 | 9.0 | 11.8 | 5.36±3.74 |  |  |
| Relative Humidity (%) | Before | 23 | 72 | 80 | 86 | 100 | 77.36±12.58 | -5.94 | <0.01 |
|  | During | 28 | 70 | 77 | 83 | 98 | 75.16±11.94 |  |  |
| Wind speed (0.1 m/s) | Before | 0 | 13 | 16 | 21 | 61 | 18.17±7.68 | -13.11 | <0.01 |
|  | During | 0 | 2 | 13 | 19 | 98 | 14.67±15.34 |  |  |
| Mean air pressure (hpa) | Before | 983.1 | 1000.8 | 1005.7 | 1010.3 | 1027.3 | 1005.54±6.57 | -0.66 | 0.51 |
|  | During | 988.7 | 1000.60 | 1005.20 | 1010.00 | 1020.3 | 1005.43±5.94 |  |  |
| Visibility (km) | Before | 2.7 | 18.1 | 23.8 | 28.7 | 39.3 | 22.62±6.63 | -14.41 | <0.01 |
|  | During | 4.6 | 23.9 | 28.7 | 30.0 | 70.4 | 26.20±5.26 |  |  |
| Cumulative daily rainfall (mm) | Before | 0 | 0 | 0 | 16 | 1735 | 55.93±163.41 | 0.62 | 0.54 |
|  | During | 0 | 0 | 0 | 13.25 | 1774 | 50.00±153.38 |  |  |
| Average total cloud cover (%) | Before | 0 | 57 | 73 | 81 | 100 | 68.01±21.32 | -19.47 | <0.01 |
|  | During | 0 | 8 | 30 | 72 | 100 | 40.24±34.80 |  |  |
| Mean water vapor pressure (hpa) | Before | 31 | 168 | 239 | 313 | 391 | 234.76±82.68 | -0.85 | 0.39 |
|  | During | 32 | 164.0 | 239.5 | 312.0 | 354 | 232.94±81.55 |  |  |
| Mean temperature (℃) | Before | 3.5 | 19.6 | 24.5 | 28.0 | 32.4 | 23.50±5.27 | -1.74 | 0.08 |
|  | During | 7 | 20 | 24.9 | 28.5 | 31.7 | 23.82±5.26 |  |  |

| **Table S2** Sparse Matrix of covariates coefficients | | |
| --- | --- | --- |
| Factors | 2016.1.1-2020.1.22 | 2020.1.23-2022.12.31 |
| (Intercept) | 227.1884592 | 191.7535524 |
| CO(mg/m3) | -8.2194518 | 6.64847782 |
| PM2.5 (ug/m3) |  | -2.35865771 |
| NO2 (ug/m3) | 0.6875006 | 1.81574429 |
| SO2 (ug/m3) | -11.0060895 | 2.12051586 |
| O3 (ug/m3) |  |  |
| Air Quality Index (AQI) | 0.1269796 |  |
| PM10(ug/m3) | 0.5129354 | 0.97686083 |
| Sunshine duration (h) |  | -2.73830184 |
| Relative Humidity (%) | -0.4857699 |  |
| Wind speed (0.1 m/s) |  | 0.08647159 |
| Mean air pressure (hpa) |  |  |
| Visibility (km) |  | 0.3919367 |
| Cumulative daily rainfall (mm) |  | 0.02734445 |
| Average total cloud cover (%) | -0.1373754 | -0.84181006 |
| Mean water vapor pressure (hpa) |  |  |
| Mean temperature (℃) |  | 1.9362141 |

| **Table S3** the sensitive analysis of single pollutant model in Shenzhen from 2016.1.1 to 2020.1.22. | | |
| --- | --- | --- |
| lag--cumulative effects | SO2=6 (ug/m3) | CO=6(mg/m3) |
| lag0 | 1.077(0.963-1.205) | 1.038(0.984-1.095) |
| lag1 | 1.034(0.919-1.163) | 1.059(1.001-1.120) |
| lag2 | 1.039(0.919-1.173) | 1.048(0.986-1.114) |
| lag3 | 1.072(0.937-1.226) | 1.047(0.975-1.123) |
| lag4 | 1.094(0.950-1.260) | 1.063(0.984-1.148) |
| lag5 | 1.117(0.960-1.299) | 1.063(0.976-1.157) |
| lag6 | 1.180(1.002-1.391) | 1.030 (0.937-1.132) |
| lag7 | 1.229(1.040-1.451) | 1.105(0.999-1.223) |
|  |  |  |
| **Table S4**  the sensitive analysis of single pollutant model in Shenzhen from 2020.1.23 to 2022.12.31. | | |
| lag--cumulative effects | Sunshine duration=0 (h) | CO=5(mg/m3) |
| lag0 | 1.032(0.885-1.203) | 1.001(0.938-1.069) |
| lag1 | 1.150(0.953-1.387) | 1.011(0.942-1.086) |
| lag2 | 1.201(0.962-1.498) | 1.022(0.947-1.103) |
| lag3 | 1.247(0.963-1.615) | 1.041(0.955-1.135) |
| lag4 | 1.344(1.011-1.788) | 1.073(0.978-1.178) |
| lag5 | 1.441(1.052-1.974) | 1.111(1.004-1.229) |
| lag6 | 1.467(1.037-2.077) | 1.132(1.013-1.266) |
| lag7 | 1.702(1.176-2.463) | 1.117(0.990-1.260) |

| **Table S5** the sensitive analysis of df value of time at 6 from 2016.1.1 to 2020.1.22. | | |
| --- | --- | --- |
| lag--cumulative effects | SO2=6 (ug/m3) | CO=6(mg/m3) |
| lag0 | 1.090(0.974-1.221) | 1.040(0.984-1.099) |
| lag1 | 1.039 (0.921 -1.172) | 1.060(1.001-1.123) |
| lag2 | 1.047(0.925-1.185) | 1.047 (0.983-1.114) |
| lag3 | 1.085 (0.948-1.242) | 1.043(0.970-1.121) |
| lag4 | 1.104(0.958 -1.271) | 1.060(0.980-1.147) |
| lag5 | 1.118(0.961-1.302) | 1.062(0.973-1.158) |
| lag6 | 1.186(1.006-1.398) | 1.026(0.932-1.130) |
| lag7 | 1.237 (1.049-1.459) | 1.086(0.981-1.204) |
|  |  |  |
| **Table S6** the sensitive analysis of df value of time at 6 from 2020.1.23 to 2022.12.31. | | |
| lag--cumulative effects | Sunshine duration=0 (h) | CO=5(mg/m3) |
| lag0 | 1.069(0.916-1.249) | 0.990(0.926-1.059) |
| lag1 | 1.236(1.022-1.494) | 1.000(0.930-1.076) |
| lag2 | 1.348(1.079-1.683) | 1.008(0.931-1.092) |
| lag3 | 1.448(1.117-1.876) | 1.021(0.932-1.118) |
| lag4 | 1.589(1.194-2.116) | 1.048(0.951-1.156) |
| lag5 | 1.729(1.261-2.370) | 1.088(0.979-1.209) |
| lag6 | 1.799(1.272-2.545) | 1.116(0.994-1.254) |
| lag7 | 2.074(1.432-3.005) | 1.100(0.971-1.246) |
|  |  |  |

| **Table S7** the sensitive analysis of df value of time at 8 from 2016.1.1 to 2020.1.22. | | |
| --- | --- | --- |
| lag--cumulative effects | SO2=6 (ug/m3) | CO=6(mg/m3) |
| lag0 | 1.069(0.954-1.198) | 1.041(0.985-1.101) |
| lag1 | 1.017(0.901-1.148) | 1.069(1.008-1.133) |
| lag2 | 1.024(0.904-1.161) | 1.060(0.995-1.130) |
| lag3 | 1.060(0.924-1.217) | 1.060(0.985-1.141) |
| lag4 | 1.079 (0.933-1.248) | 1.081(0.997-1.173) |
| lag5 | 1.095(0.936-1.280) | 1.085(0.993-1.187) |
| lag6 | 1.163(0.982-1.377) | 1.050(0.950-1.160) |
| lag7 | 1.221(1.029-1.448) | 1.116(1.003-1.242) |
|  |  |  |
| **Table S8** the sensitive analysis of df value of time at 8 from 2020.1.23 to 2022.12.31. | | |
| lag--cumulative effects | Sunshine duration=0 (h) | CO=5(mg/m3) |
| lag0 | 1.015(0.868- 1.187) | 1.005(0.939-1.075) |
| lag1 | 1.132(0.933-1.372) | 1.019(0.946-1.097) |
| lag2 | 1.183(0.943-1.485) | 1.028(0.948-1.115) |
| lag3 | 1.221(0.936-1.594) | 1.042(0.950-1.144) |
| lag4 | 1.302(0.970-1.748) | 1.071(0.969-1.185) |
| lag5 | 1.384(0.999-1.918) | 1.110(0.995-1.238) |
| lag6 | 1.410(0.984-2.019) | 1.136(1.008-1.280) |
| lag7 | 1.624(1.107-2.382) | 1.120(0.984-1.275) |
